# Supplementary material for: Pediatric and Adult High-Grade Glioma Stem Cell Culture Models Are Permissive to Lytic Infection with Parvovirus H-1
Source: PubMed Central journal article supplement (PMC4885093; doi:10.3390/v8050138), 2016-05-19

# Supplementary Materials: Pediatric and Adult High-Grade Glioma Stem Cell Culture Models Are Permissive to Lytic Infection with Parvovirus H-1

Rafael Josupeit, Sebastian Bender, Sonja Kern, Barbara Leuchs, Thomas Hielscher, Christel Herold-Mende, Jörg R. Schlehofer, Christiane Dinsart, Olaf Witt, Jean Rommelaere and Jeannine Lacroix

Table S1. Transcriptome analysis of the uninfected H-1PV permissive NCH421k neurosphere culture and the partially permissive, NCHI and resistant NCHR subclones. Genes most significantly over expressed in NCH421k.

| Gene            | Probe        | NCH421K | NCH421I | NCH421R | R-K    |
|-----------------|--------------|---------|---------|---------|--------|
| FAM49B          | 217916_s_at  | 12.347  | 8.050   | 3.536   | -8.811 |
| <b>B4GALNT1</b> | 1555385_at   | 11.723  | 4.907   | 4.621   | -7.102 |
| COL4A5          | 213110_s_at  | 6.760   | 4.000   | 0.000   | -6.760 |
| SLITRK4         | 232636_at    | 9.450   | 2.379   | 2.744   | -6.706 |
| SLC26A10        | 214951_at    | 10.967  | 6.219   | 4.542   | -6.425 |
| <b>IFITM3</b>   | 212203_x_at  | 8.086   | 7.615   | 2.036   | -6.050 |
| ASAP1           | 224791_at    | 8.466   | 8.260   | 3.000   | -5.466 |
| LAYN            | 228080_at    | 6.810   | 1.536   | 1.379   | -5.431 |
| <b>NTRK2</b>    | 221796_at    | 8.241   | 5.741   | 2.868   | -5.373 |
| HHIP            | 230135_at    | 5.213   | 3.838   | 0.000   | -5.213 |
| AGAP2           | 229917_at    | 7.181   | 1.536   | 2.000   | -5.181 |
| PLEKHA5         | 220952_s_at  | 6.428   | 3.982   | 1.433   | -4.995 |
| FNDC5           | 226096_at    | 6.000   | 4.446   | 1.632   | -4.368 |
| ARHGEF25        | 227427_at    | 10.759  | 6.986   | 6.547   | -4.212 |
| CTGF            | 209101_at    | 8.195   | 7.061   | 4.121   | -4.074 |
| CHI3L1          | 209395_at    | 5.921   | 5.517   | 1.926   | -3.995 |
| RNF175          | 236465_at    | 6.868   | 6.287   | 2.907   | -3.961 |
| SLC16A7         | 207057_at    | 7.173   | 5.256   | 3.293   | -3.880 |
| DCC             | 238914_at    | 7.668   | 0.000   | 3.848   | -3.820 |
| SPATA9          | 223840_s_at  | 4.062   | 4.420   | 0.263   | -3.799 |
| LOC100131860    | 1559180_at   | 4.372   | 4.053   | 0.585   | -3.787 |
| C21orf62        | 220543_at    | 3.916   | 5.267   | 0.138   | -3.779 |
| NRP1            | 212298_at    | 3.766   | 0.000   | 0.000   | -3.766 |
| KCNS3           | 205968_at    | 7.279   | 5.194   | 3.561   | -3.718 |
| LIN7A           | 227929_at    | 5.336   | 0.000   | 1.632   | -3.704 |
| ACAP3           | 225529_at    | 6.435   | 6.615   | 2.744   | -3.690 |
| NXPH1           | 232377_at    | 10.381  | 7.070   | 6.717   | -3.664 |
| KCNJ2           | 206765_at    | 6.282   | 4.104   | 2.678   | -3.604 |
| CASZ1           | 243386_at    | 4.573   | 3.154   | 1.000   | -3.573 |
| UBALD1          | 1558976_x_at | 4.329   | 5.233   | 0.766   | -3.564 |
| THSD4           | 222835_at    | 7.941   | 6.604   | 4.406   | -3.535 |
| VWCE            | 242957_at    | 6.418   | 5.423   | 2.888   | -3.530 |
| C14orf39        | 1561985_at   | 3.511   | 2.561   | 0.000   | -3.511 |
| LOC442075       | 237005_at    | 5.267   | 6.903   | 1.766   | -3.501 |
| FOXP4           | 227120_at    | 5.558   | 5.248   | 2.138   | -3.420 |
| ELAVL4          | 238073_at    | 8.095   | 3.711   | 4.689   | -3.406 |
| DRP2            | 1556627_at   | 3.365   | 3.797   | 0.000   | -3.365 |
| UGT8            | 228956_at    | 9.403   | 7.789   | 6.070   | -3.333 |
| PIEZO2          | 219602_s_at  | 6.053   | 4.027   | 2.787   | -3.267 |

|          |             |        |        |       |        |
|----------|-------------|--------|--------|-------|--------|
| ARHGAP23 | 226638_at   | 6.705  | 6.215  | 3.446 | -3.258 |
| SLC18A1  | 207074_s_at | 5.681  | 3.573  | 2.433 | -3.248 |
| FMO5     | 215300_s_at | 6.759  | 3.018  | 3.536 | -3.223 |
| NAP1L2   | 219368_at   | 7.101  | 4.542  | 3.897 | -3.204 |
| NAP1L3   | 204749_at   | 8.008  | 5.289  | 4.818 | -3.191 |
| OCLN     | 231022_at   | 6.213  | 6.213  | 3.070 | -3.143 |
| NCAN     | 205143_at   | 10.663 | 11.079 | 7.525 | -3.138 |
| FCRLA    | 235400_at   | 7.348  | 9.076  | 4.263 | -3.085 |
| PCDH19   | 227282_at   | 7.534  | 7.440  | 4.459 | -3.075 |
| ZFP82    | 235176_at   | 6.710  | 5.621  | 3.644 | -3.066 |
| SLC6A13  | 237058_x_at | 3.322  | 3.433  | 0.263 | -3.059 |
| COL21A1  | 208096_s_at | 7.168  | 3.828  | 4.129 | -3.039 |
| MVD      | 203027_s_at | 4.797  | 5.304  | 1.766 | -3.031 |
| NPW      | 243110_x_at | 8.343  | 8.372  | 5.326 | -3.018 |

Genes discussed in the text are indicated in red.

Table S2. Gene expression analysis of the uninfected H-1PV permissive NCH421k neurosphere culture and the partially permissive, NCHI and resistant NCHR subclones. Genes most significantly over expressed in NCH421R.

| Gene          | Probe       | NCH421K * | NCH421I | NCH421R * | R/-K * |
|---------------|-------------|-----------|---------|-----------|--------|
| <b>CTHRC1</b> | 225681_at   | 1.632     | 11.146  | 11.739    | 10.107 |
| RPS4Y1        | 201909_at   | 3.755     | 2.036   | 12.212    | 8.457  |
| EIF1AY        | 204409_s_at | 1.722     | 1.807   | 9.589     | 7.867  |
| USP9Y         | 228492_at   | 0.379     | 2.170   | 7.877     | 7.498  |
| DDX3Y         | 205000_at   | 3.087     | 3.278   | 10.350    | 7.263  |
| DPYD          | 204646_at   | 1.379     | 5.752   | 8.519     | 7.140  |
| LPAR3         | 231192_at   | 0.000     | 0.000   | 7.081     | 7.081  |
| UTY           | 208067_x_at | 0.766     | 1.000   | 7.489     | 6.724  |
| PNMAL1        | 218824_at   | 3.263     | 9.139   | 9.951     | 6.688  |
| LPAR6         | 218589_at   | 0.000     | 2.963   | 6.594     | 6.594  |
| S100A10       | 200872_at   | 2.322     | 6.562   | 8.908     | 6.586  |
| BEND7         | 227341_at   | 0.000     | 6.096   | 6.438     | 6.438  |
| GAGE3         | 207663_x_at | 1.070     | 2.848   | 7.402     | 6.331  |
| FNDC7         | 240837_at   | 1.322     | 2.233   | 7.194     | 5.872  |
| MAGEA10       | 210295_at   | 0.926     | 0.138   | 6.796     | 5.870  |
| CA12          | 214164_x_at | 2.828     | 5.070   | 8.663     | 5.835  |
| STEAP2        | 225871_at   | 1.632     | 6.966   | 7.384     | 5.751  |
| TP53INP1      | 225912_at   | 0.000     | 3.472   | 5.618     | 5.618  |
| POSTN         | 210809_s_at | 0.263     | 0.263   | 5.860     | 5.597  |
| NLGN4Y        | 207703_at   | 2.828     | 3.170   | 8.392     | 5.564  |
| SELM          | 226051_at   | 0.000     | 1.632   | 5.495     | 5.495  |
| RBPMS2        | 228802_at   | 0.138     | 0.000   | 5.618     | 5.480  |
| HS3ST3A1      | 219985_at   | 0.000     | 5.365   | 5.426     | 5.426  |
| TXLNG2P       | 236694_at   | 2.888     | 2.202   | 8.176     | 5.288  |
| FAM149A       | 214889_at   | 0.000     | 3.818   | 5.282     | 5.282  |
| GRTP1         | 229377_at   | 0.138     | 2.070   | 5.361     | 5.224  |
| <b>TRIM38</b> | 203568_s_at | 1.138     | 3.689   | 6.311     | 5.174  |
| ZDHHC4        | 220261_s_at | 1.379     | 6.815   | 6.550     | 5.171  |
| KDM5D         | 206700_s_at | 2.138     | 3.138   | 7.296     | 5.158  |
| NRTN          | 210683_at   | 0.138     | 3.350   | 5.282     | 5.144  |
| SPP1          | 209875_s_at | 7.371     | 10.076  | 12.441    | 5.071  |
| FAM133A       | 231131_at   | 0.926     | 7.261   | 5.993     | 5.067  |

|                 |                    |              |              |              |              |
|-----------------|--------------------|--------------|--------------|--------------|--------------|
| KDELR3          | 204017_at          | 5.340        | 5.845        | 10.388       | 5.048        |
| TCL6            | 219840_s_at        | 0.000        | 2.170        | 4.863        | 4.863        |
| EFCAB4B         | 228752_at          | 1.202        | 4.678        | 6.057        | 4.856        |
| KIAA1456        | 239297_at          | 1.000        | 4.459        | 5.820        | 4.820        |
| ZFY             | 230760_at          | 2.485        | 1.322        | 7.282        | 4.796        |
| KCNJ4           | 208359_s_at        | 1.926        | 4.027        | 6.688        | 4.762        |
| ZNF441          | 1553193_at         | 0.000        | 2.293        | 4.684        | 4.684        |
| <b>TGFB1</b>    | <b>203085_s_at</b> | <b>0.000</b> | <b>4.365</b> | <b>4.667</b> | <b>4.667</b> |
| S100A11         | 200660_at          | 0.926        | 4.892        | 5.533        | 4.607        |
| GAGE1           | 208283_at          | 1.585        | 0.678        | 6.162        | 4.577        |
| PELI3           | 235431_s_at        | 1.485        | 4.888        | 5.993        | 4.508        |
| HSD17B6         | 205700_at          | 2.585        | 5.888        | 7.003        | 4.418        |
| SPARCL1         | 200795_at          | 8.284        | 11.656       | 12.655       | 4.371        |
| BGN             | 213905_x_at        | 1.766        | 1.632        | 6.094        | 4.328        |
| EPHX4           | 239579_at          | 2.848        | 6.684        | 7.171        | 4.323        |
| AFF3            | 227198_at          | 2.263        | 5.805        | 6.567        | 4.304        |
| SOSTDC1         | 213456_at          | 2.459        | 4.776        | 6.713        | 4.253        |
| EFNA2           | 238956_at          | 1.848        | 1.263        | 6.036        | 4.188        |
| SLC47A1         | 219525_at          | 3.632        | 8.086        | 7.806        | 4.174        |
| DOCK6           | 221794_at          | 1.322        | 3.733        | 5.485        | 4.163        |
| HDHD3           | 221256_s_at        | 1.202        | 3.766        | 5.274        | 4.073        |
| KRTAP19-3       | 240967_at          | 0.585        | 3.511        | 4.615        | 4.030        |
| GRAMD3          | 218706_s_at        | 1.585        | 0.000        | 5.615        | 4.030        |
| CORO2A          | 227177_at          | 1.585        | 3.776        | 5.591        | 4.006        |
| TBX1            | 236926_at          | 2.848        | 6.451        | 6.777        | 3.929        |
| HFM1            | 241469_at          | 0.000        | 3.828        | 3.907        | 3.907        |
| <b>APOBEC3A</b> | <b>210873_x_at</b> | <b>0.000</b> | <b>2.700</b> | <b>3.888</b> | <b>3.888</b> |
| KLK15           | 221462_x_at        | 0.138        | 2.828        | 4.018        | 3.880        |
| C3orf18         | 219114_at          | 1.202        | 4.498        | 5.040        | 3.838        |
| IL13RA2         | 206172_at          | 0.000        | 1.678        | 3.818        | 3.818        |
| TENM4           | 213273_at          | 2.722        | 6.198        | 6.531        | 3.809        |
| PROCR           | 203650_at          | 4.365        | 7.007        | 8.170        | 3.805        |
| GYPC            | 202947_s_at        | 3.561        | 6.492        | 7.349        | 3.788        |
| MPPED2          | 205413_at          | 4.973        | 8.243        | 8.760        | 3.788        |
| MFAP4           | 212713_at          | 2.848        | 6.914        | 6.634        | 3.786        |
| FABP6           | 210445_at          | 4.706        | 6.489        | 8.487        | 3.781        |
| <b>TRIM5</b>    | <b>210705_s_at</b> | <b>3.472</b> | <b>5.703</b> | <b>7.252</b> | <b>3.779</b> |
| FAM105A         | 219694_at          | 2.170        | 3.365        | 5.897        | 3.727        |
| LOC100270680    | 1561232_at         | 2.744        | 4.561        | 6.471        | 3.727        |
| PCSK1           | 205825_at          | 1.485        | 3.868        | 5.198        | 3.712        |
| CCDC71L         | 226756_at          | 4.365        | 5.443        | 8.075        | 3.710        |
| SLITRK6         | 232481_s_at        | 4.154        | 5.202        | 7.857        | 3.703        |
| SNX29P2         | 214712_at          | 0.263        | 3.755        | 3.963        | 3.700        |
| HERC5           | 219863_at          | 3.121        | 6.977        | 6.819        | 3.698        |
| PCDHGA1         | 211880_x_at        | 0.379        | 1.322        | 4.070        | 3.692        |
| EDNRB           | 204273_at          | 5.840        | 7.492        | 9.522        | 3.681        |
| EBF3            | 227242_s_at        | 0.000        | 4.225        | 3.678        | 3.678        |
| SUSD5           | 214954_at          | 5.443        | 9.332        | 9.117        | 3.674        |
| GRIP1           | 235957_at          | 2.536        | 6.320        | 6.209        | 3.673        |
| RBPMS           | 209487_at          | 2.585        | 5.970        | 6.248        | 3.663        |
| EMILIN1         | 204163_at          | 1.070        | 5.773        | 4.706        | 3.636        |
| MFI2            | 235911_at          | 2.293        | 2.433        | 5.916        | 3.624        |

|              |                  |              |              |              |              |
|--------------|------------------|--------------|--------------|--------------|--------------|
| PLA2G7       | 206214_at        | 2.070        | 3.170        | 5.684        | 3.613        |
| CD84         | 211189_x_at      | 0.379        | 4.661        | 3.991        | 3.612        |
| GPR158       | 232195_at        | 2.406        | 4.285        | 5.977        | 3.571        |
| FCGRT        | 218831_s_at      | 3.963        | 5.453        | 7.534        | 3.570        |
| ELK3         | 221773_at        | 5.372        | 7.347        | 8.917        | 3.545        |
| CD24         | 216379_x_at      | 5.567        | 9.992        | 9.102        | 3.535        |
| C1S          | 208747_s_at      | 1.000        | 3.018        | 4.524        | 3.524        |
| PERP         | 222392_x_at      | 6.211        | 7.214        | 9.730        | 3.519        |
| CTSL1P8      | 1563445_x_at     | 0.766        | 3.926        | 4.271        | 3.505        |
| CLMP         | 228082_at        | 1.202        | 2.000        | 4.700        | 3.499        |
| DAND5        | 1562772_a_at     | 0.766        | 4.615        | 4.233        | 3.467        |
| DNASE1L3     | 205554_s_at      | 0.138        | 3.446        | 3.585        | 3.447        |
| HSPA6        | 213418_at        | 4.945        | 4.744        | 8.388        | 3.443        |
| TMEM47       | 209656_s_at      | 0.379        | 0.000        | 3.818        | 3.439        |
| ATP1A1OS     | 236623_at        | 1.138        | 2.433        | 4.573        | 3.435        |
| PDLIM1       | 208690_s_at      | 3.700        | 5.855        | 7.135        | 3.435        |
| SLC38A5      | 234973_at        | 3.036        | 7.918        | 6.461        | 3.425        |
| ZNF204P      | 214823_at        | 0.848        | 3.263        | 4.271        | 3.423        |
| PDE1C        | 236344_at        | 4.113        | 4.926        | 7.524        | 3.411        |
| ANXA4        | 201301_s_at      | 5.198        | 7.212        | 8.597        | 3.400        |
| TMEM159      | 213272_s_at      | 3.722        | 6.178        | 7.122        | 3.400        |
| OLFM3        | 1554526_at       | 2.104        | 4.760        | 5.495        | 3.391        |
| TPTE         | 220205_at        | 0.138        | 0.678        | 3.524        | 3.386        |
| <b>TLR3</b>  | <b>206271_at</b> | <b>1.379</b> | <b>4.385</b> | <b>4.760</b> | <b>3.382</b> |
| PTGIS        | 208131_s_at      | 3.878        | 5.443        | 7.248        | 3.370        |
| ATP1B2       | 204311_at        | 3.170        | 4.644        | 6.525        | 3.355        |
| TNFSF13B     | 223502_s_at      | 3.121        | 1.536        | 6.472        | 3.351        |
| FAM71E1      | 229289_at        | 1.766        | 3.170        | 5.113        | 3.347        |
| LOC100507376 | 229189_s_at      | 1.963        | 4.070        | 5.307        | 3.344        |
| MGP          | 202291_s_at      | 2.982        | 0.000        | 6.318        | 3.336        |
| LOC153682    | 232794_at        | 0.000        | 4.170        | 3.336        | 3.336        |
| AS3MT        | 223652_at        | 2.104        | 3.776        | 5.436        | 3.332        |
| ZNF479       | 1555367_at       | 1.202        | 2.655        | 4.511        | 3.309        |
| LOC100506190 | 217625_x_at      | 2.104        | 4.597        | 5.406        | 3.302        |
| TTY15        | 214983_at        | 2.868        | 3.524        | 6.154        | 3.286        |
| FAM134B      | 218532_s_at      | 5.389        | 5.555        | 8.662        | 3.273        |
| CCDC113      | 222890_at        | 3.170        | 5.166        | 6.440        | 3.270        |
| PLAC9        | 227419_x_at      | 0.379        | 1.070        | 3.644        | 3.265        |
| PSMD5        | 203447_at        | 2.963        | 1.263        | 6.227        | 3.263        |
| FBLN1        | 202994_s_at      | 3.379        | 5.667        | 6.641        | 3.262        |
| TSPAN31      | 203227_s_at      | 9.000        | 9.066        | 12.243       | 3.243        |
| HSPB1        | 201841_s_at      | 5.263        | 7.940        | 8.495        | 3.232        |
| BAG3         | 217911_s_at      | 5.517        | 7.811        | 8.734        | 3.216        |
| GPR75        | 220481_at        | 0.926        | 3.733        | 4.129        | 3.203        |
| SLC4A4       | 203908_at        | 4.591        | 4.548        | 7.765        | 3.174        |
| MROH1        | 1565653_at       | 0.000        | 1.000        | 3.170        | 3.170        |
| ACSM2A       | 244723_at        | 1.848        | 2.609        | 5.005        | 3.157        |
| VTCN1        | 219768_at        | 1.000        | 0.926        | 4.146        | 3.146        |
| SMOC2        | 223235_s_at      | 2.632        | 0.138        | 5.768        | 3.136        |
| MARCH1       | 235385_at        | 3.233        | 1.138        | 6.368        | 3.135        |
| TRIM68       | 219405_at        | 1.722        | 4.129        | 4.843        | 3.121        |
| SLC43A3      | 213113_s_at      | 4.379        | 7.892        | 7.497        | 3.119        |

|                  |             |       |        |        |       |
|------------------|-------------|-------|--------|--------|-------|
| <b>STOM</b>      | 201061_s_at | 6.170 | 7.756  | 9.286  | 3.116 |
| <b>DLX6</b>      | 242940_x_at | 4.954 | 4.485  | 8.053  | 3.098 |
| <b>RGS1</b>      | 216834_at   | 0.379 | 5.687  | 3.472  | 3.094 |
| <b>IFT27</b>     | 205037_at   | 2.926 | 5.022  | 6.018  | 3.092 |
| <b>PQLC3</b>     | 225579_at   | 3.498 | 3.561  | 6.588  | 3.090 |
| <b>DSG2</b>      | 217901_at   | 5.731 | 9.590  | 8.793  | 3.062 |
| <b>LOC728558</b> | 1560352_at  | 1.322 | 2.888  | 4.379  | 3.057 |
| <b>CD44</b>      | 212063_at   | 3.087 | 7.143  | 6.138  | 3.050 |
| <b>GABRB1</b>    | 207010_at   | 3.186 | 4.293  | 6.208  | 3.022 |
| <b>CSF1</b>      | 209716_at   | 3.053 | 5.358  | 6.075  | 3.022 |
| <b>FAM213A</b>   | 228155_at   | 7.357 | 10.850 | 10.372 | 3.015 |
| <b>ALDH1L2</b>   | 231202_at   | 4.162 | 6.583  | 7.171  | 3.009 |

Genes discussed in the text are indicated in red.

**Figure S1. Copy-number aberrations in the three NCH421 clones.** Data presented for NCH421k (A) and the subclones NCH421I (B) and NCH421R (C) were obtained based on the Illumina HumanMethylation450 BeadChip assay.

(A)

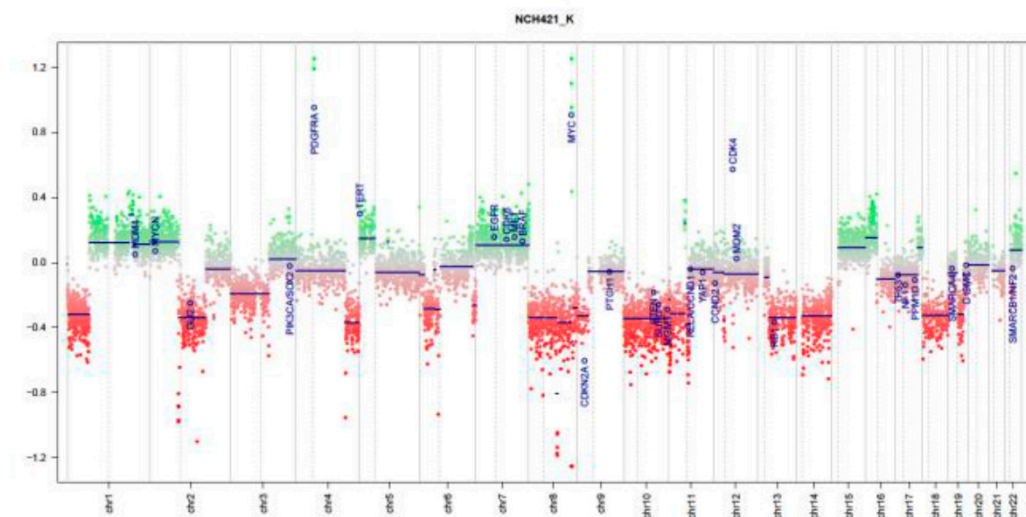

(B)

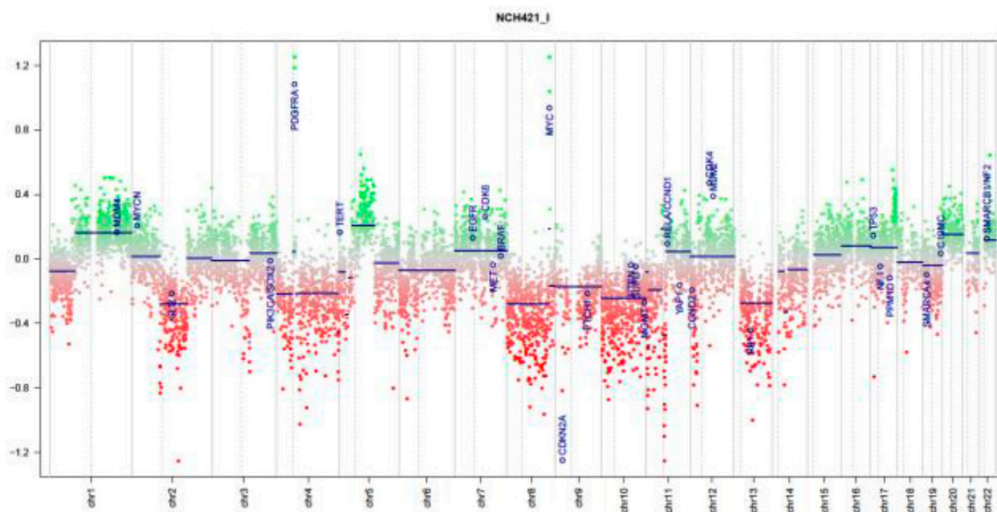

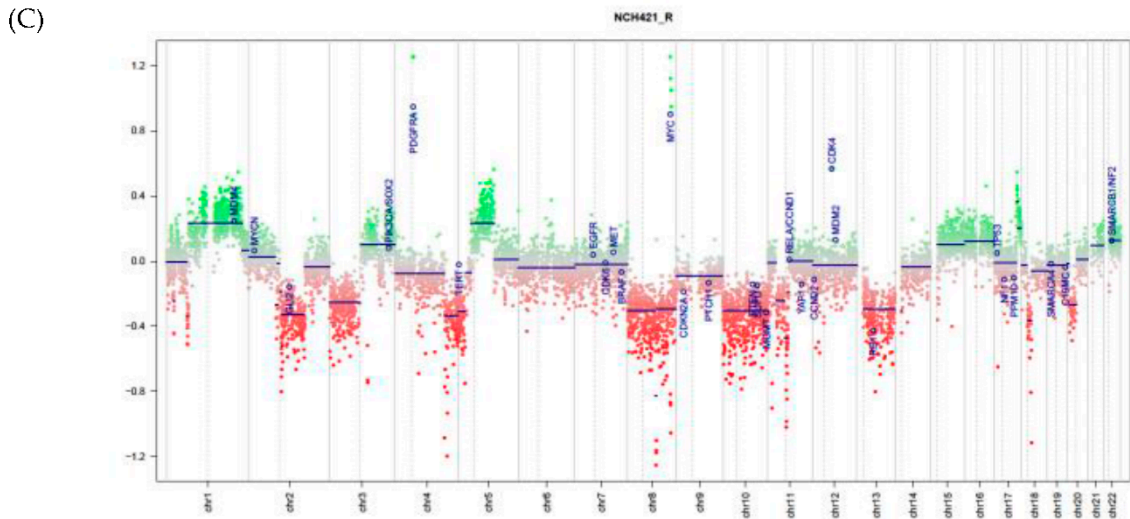

**Figure S2.** Expression levels of the viral proteins. NS1, VP1 and VP2 in H-1 PV infected neurospheres were measured in HGG neurosphere cultures by Western blot analysis. Cultures were analyzed at indicated days post infection (dpi) with H-1PV at concentrations indicated.

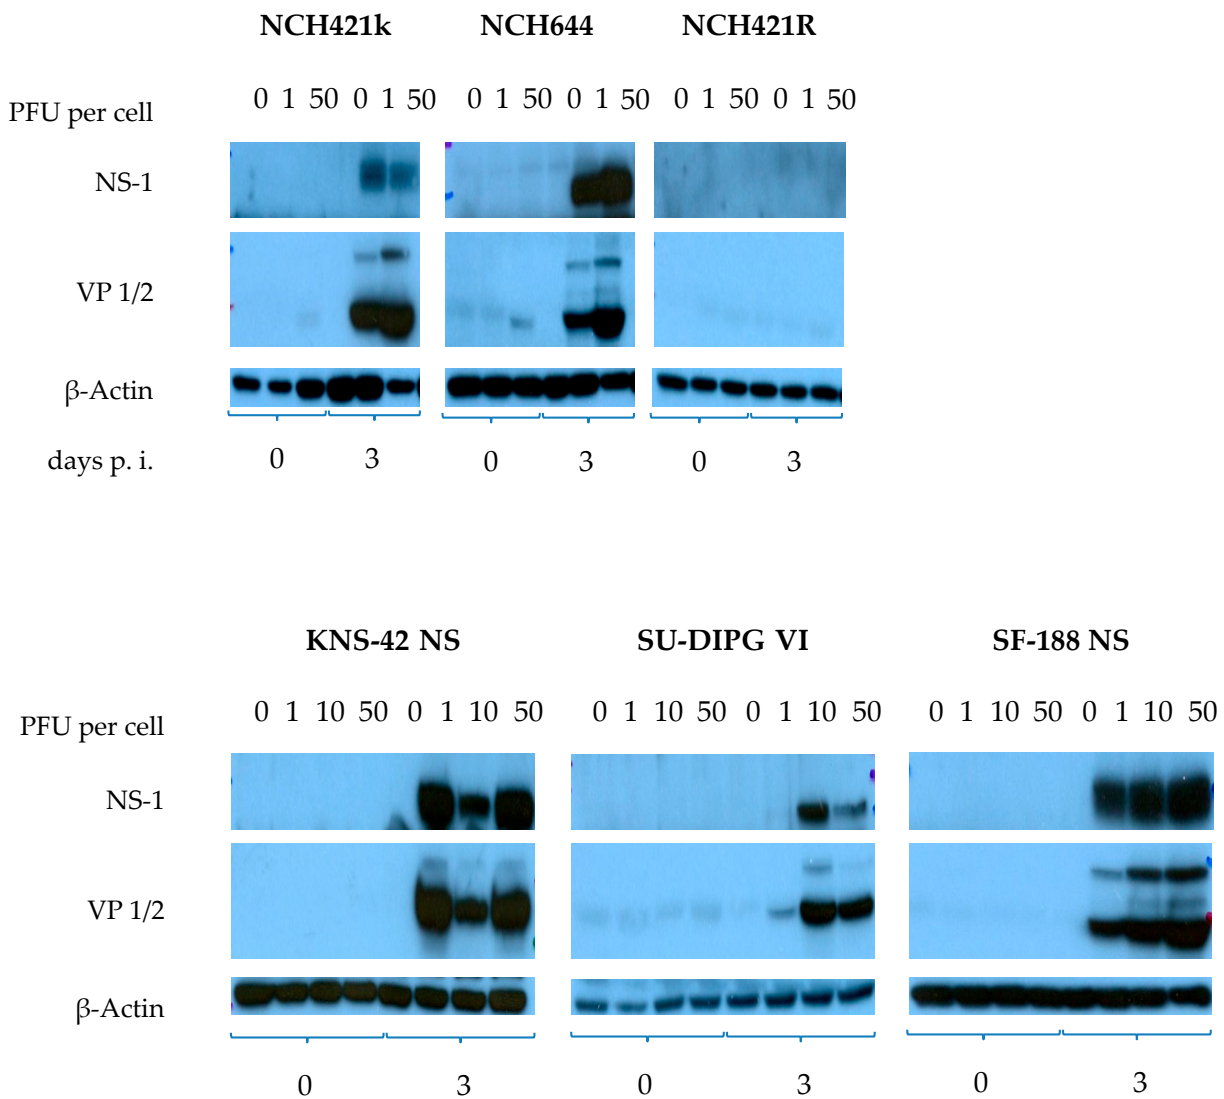

Supplement: viruses-08-00138-s001.pdf [file viruses-08-00138-s001.pdf]
